# Supplementary material for: Catalytic Oxidation of Soot on a Novel Active Ca-Co Dually-Doped Lanthanum Tin Pyrochlore Oxide
Source: MDPI journal article supplement (doi:10.3390/ma11050653), 2018-04-24
Supplement: s1 [file s1]

# Catalytic oxidation of soot on a novel active Ca-Co dually-doped lanthanum tin pyrochlore oxide

Lijie Ai, Zhongpeng Wang\*, Chenchen Cui, Wei Liu, Liguang Wang

School of Resources and Environment, Key Laboratory of Water Resources and Environmental Engineering in Universities of Shandong, University of Jinan, 336 Nanxinhuang West Road, Jinan 250022, China; [ailj20160202@163.com](mailto:ailj20160202@163.com) (L.A.); [15053102308@163.com](mailto:15053102308@163.com) (C.C.); [stu\\_liuw@ujn.edu.cn](mailto:stu_liuw@ujn.edu.cn) (W.L.); [chm\\_wanglg@ujn.edu.cn](mailto:chm_wanglg@ujn.edu.cn) (L.W.)

\* Correspondence: [chm\\_wangzp@ujn.edu.cn](mailto:chm_wangzp@ujn.edu.cn); Tel.: +86-531-82769233

**4 pages (including this page):**

**Figure S1-S2**

Figure S1.

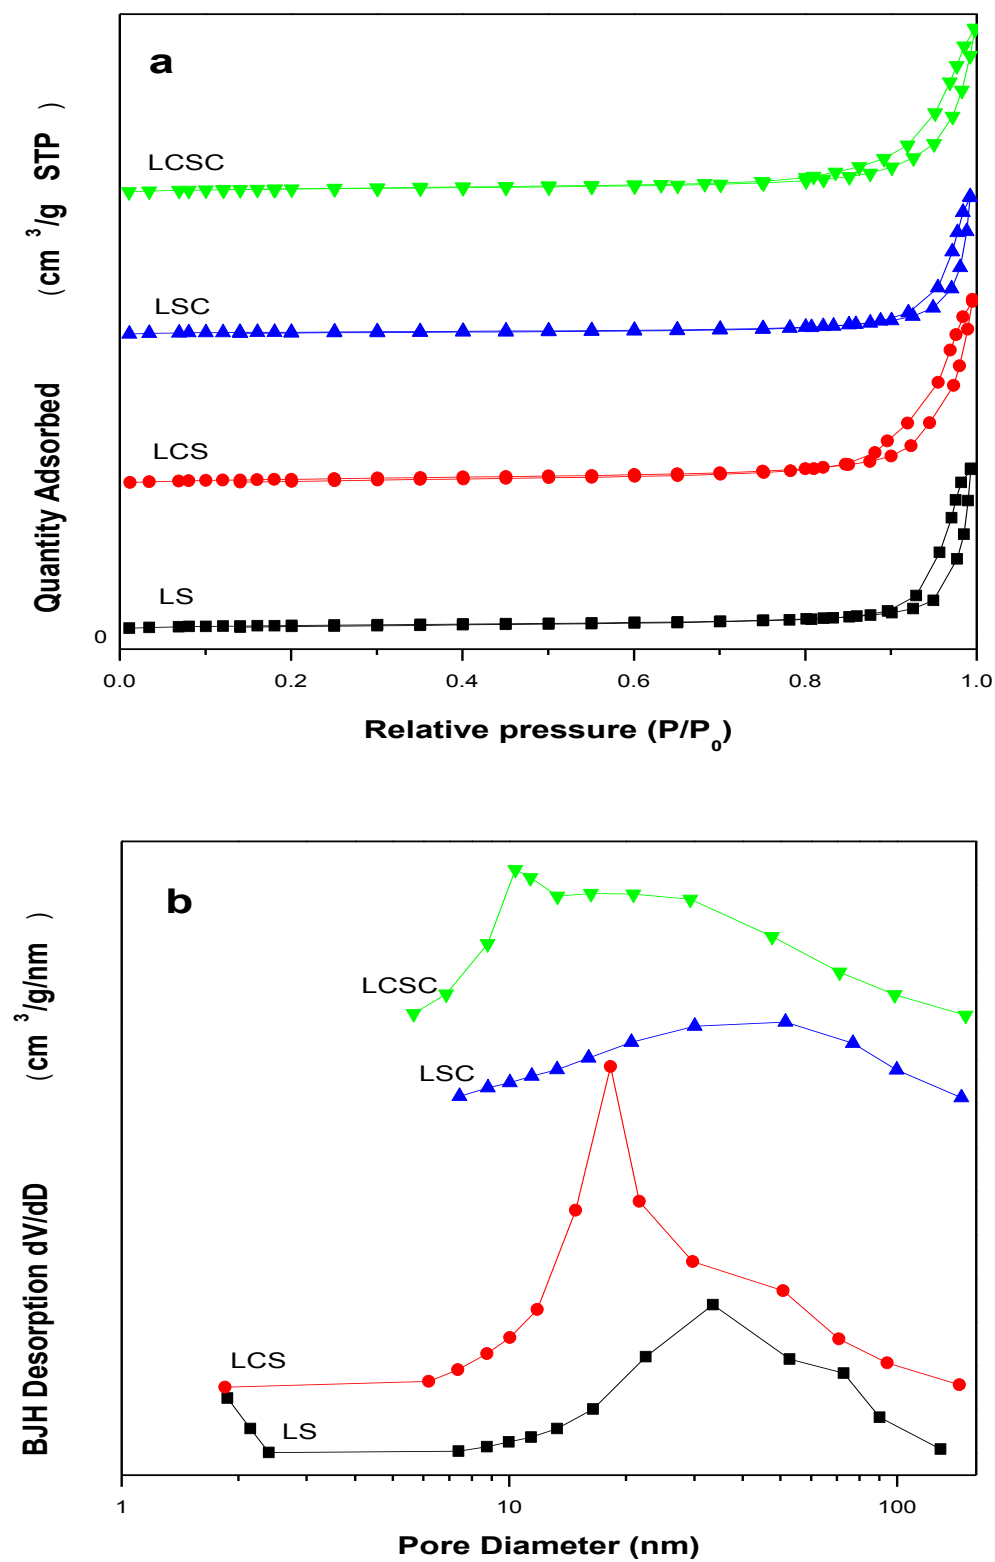

**Figure S1.** Nitrogen adsorption-desorption isotherms (a) and pore size distributions (b) of  $\text{La}_{2-x}\text{Ca}_x\text{Sn}_{2-y}\text{Co}_y\text{O}_7$  catalysts.

Figure S2.

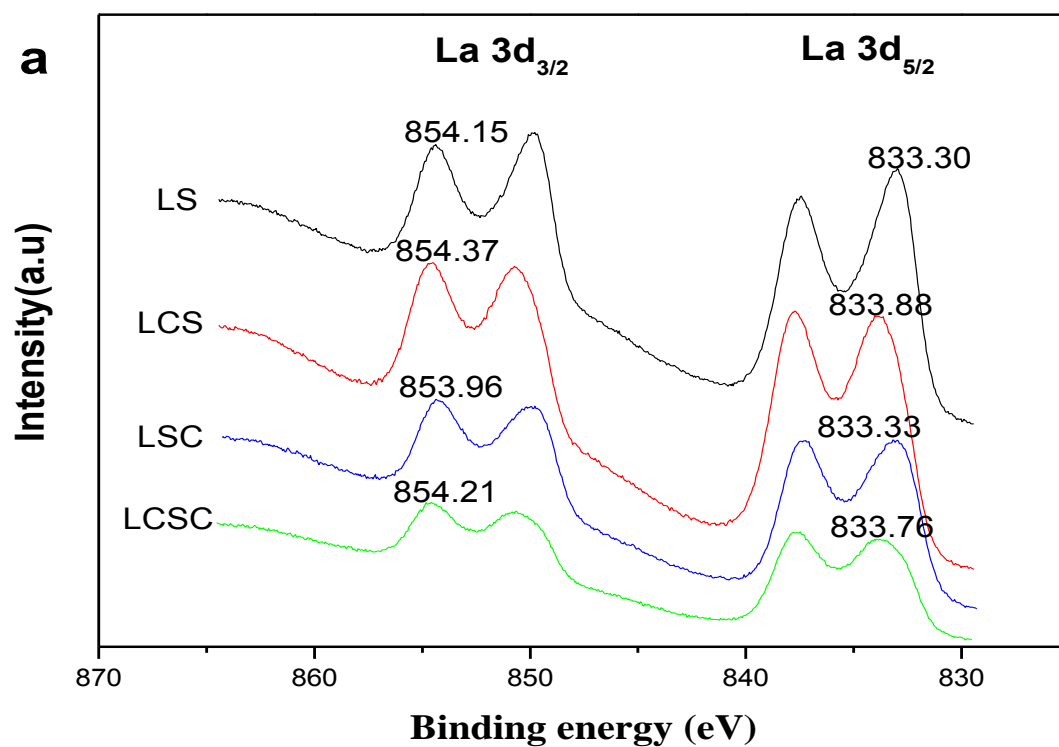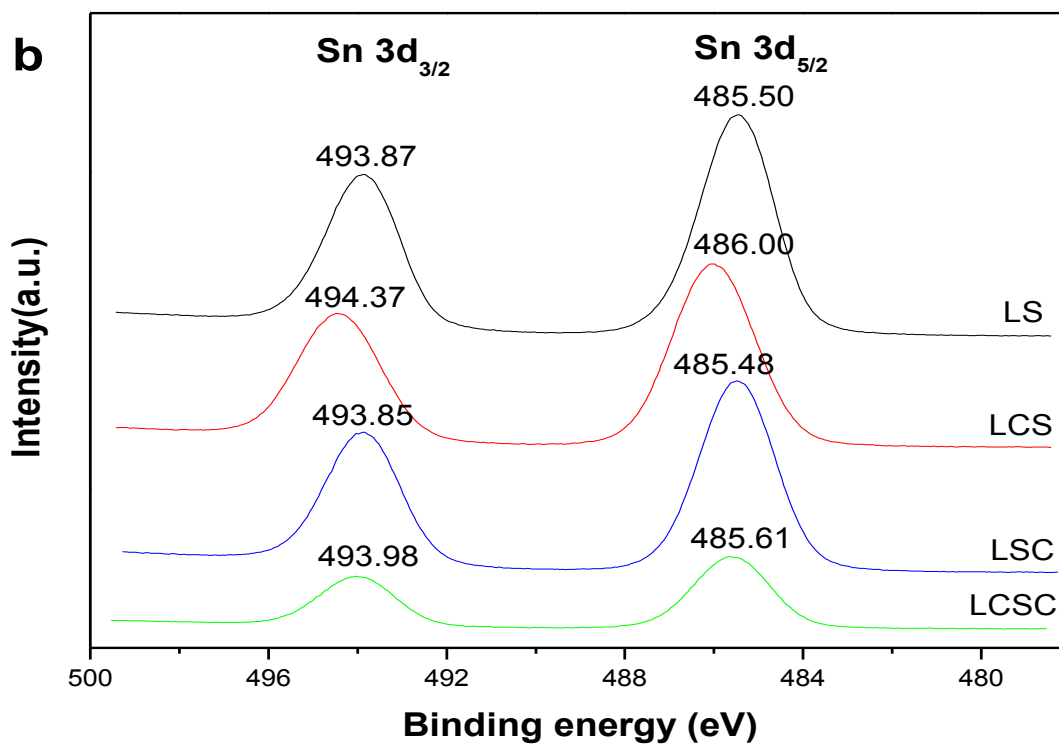

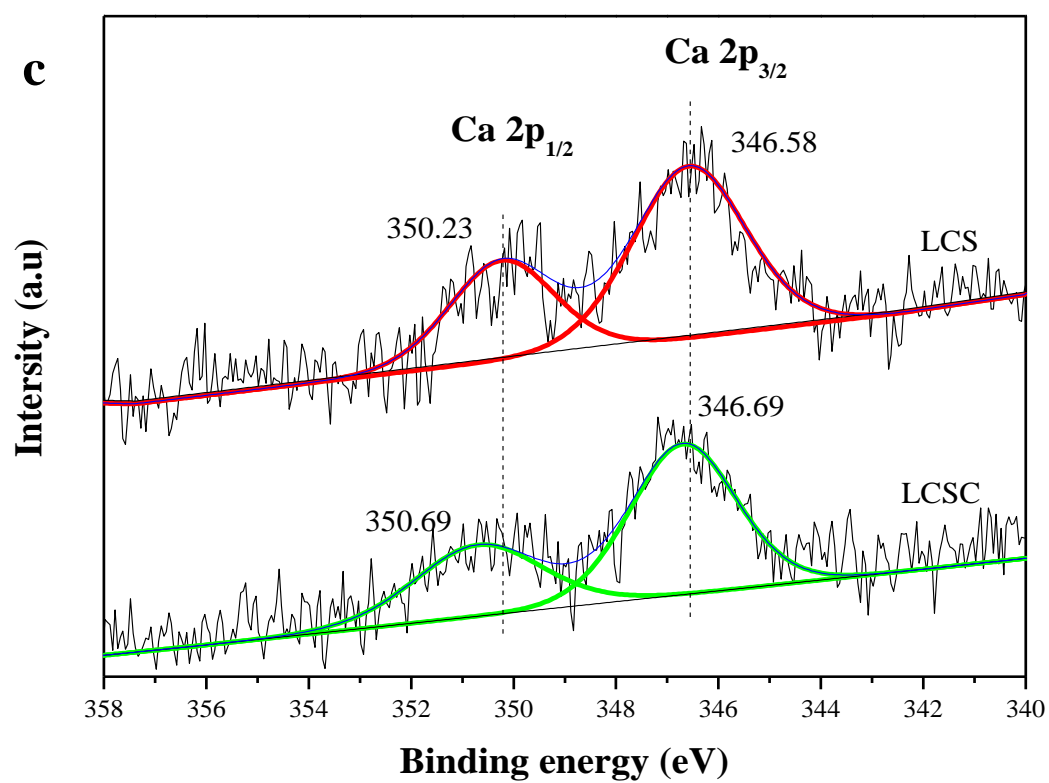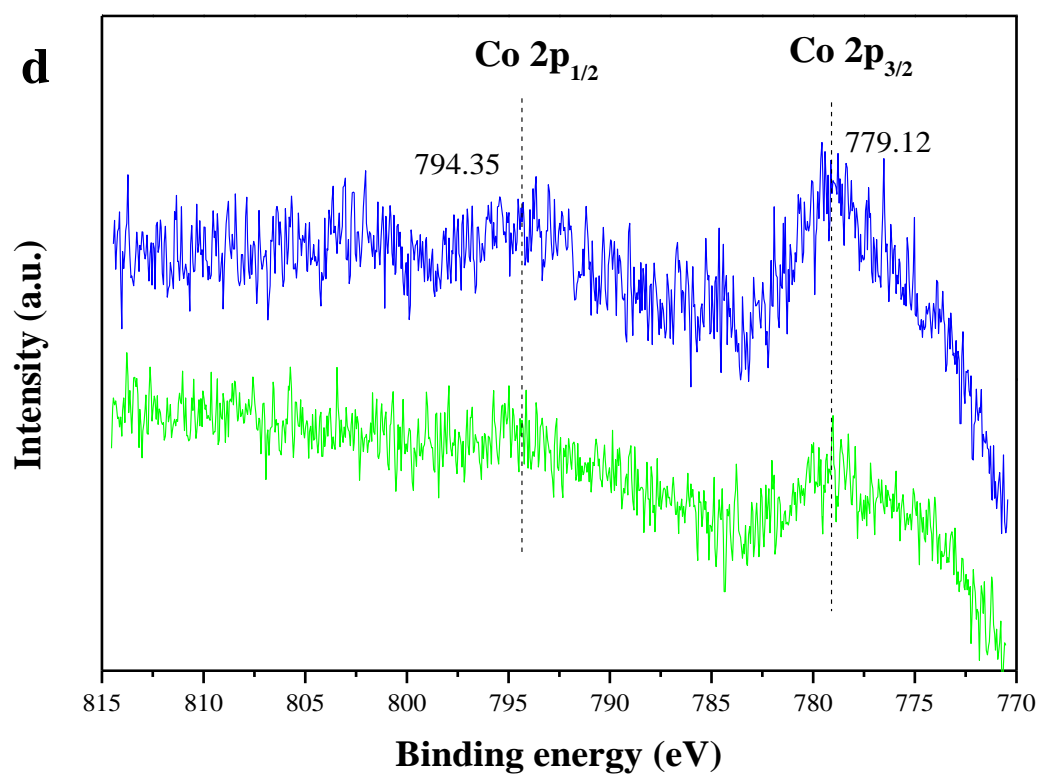

**Figure S2.** XPS spectra of (a) La 3d (b) Sn 3d (c) Ca 2p (d) Co 2p region of the obtained catalysts
